# Supplementary material for: Syntheses, Structural Characterization, and Cytotoxicity Assessment of Novel Mn(II) and Zn(II) Complexes of Aroyl-Hydrazone Schiff Base Ligand
Source: PubMed Central journal article supplement (PMC9878661; doi:10.1021/acsomega.2c05927), 2023-01-11
Supplement: ao2c05927_si_001.pdf [file ao2c05927_si_001.pdf]

## Supplementary information

### Syntheses, structural characterization and cytotoxicity assessment of novel Mn(II) and Zn(II) complexes of aroyl–hydrazone Schiff base ligands

Masrat Bashir<sup>a</sup>, Aijaz A. Dar<sup>b</sup>, Imtiyaz Yousuf<sup>a\*</sup>

\*Corresponding author *E-mail address:* [imtiyazchem@gmail.com](mailto:imtiyazchem@gmail.com). (I. Yousuf)

<sup>a</sup>*Department of Chemistry, Aligarh Muslim University, Aligarh 202002, Uttar Pradesh, India.*

<sup>b</sup>*Department of Chemistry, University of Kashmir, Hazratbal, Srinagar 190 006, J&K, India.*

#### LIST OF TABLES

| Title                                                                                  | Page No. |
|----------------------------------------------------------------------------------------|----------|
| Table S1: Crystallographic data and structure refinement details of L1.....            | S3       |
| Table S2. DFT calculated geometrical parameters of L1 .....                            | S4       |
| Table S3. DFT calculated geometrical parameters of complex 1.....                      | S4       |
| Table S4. DFT calculated geometrical parameters of complex 2 .....                     | S5       |
| Table S5. Energy of various FMOs of L1, complex 1 and complex 2 .....                  | S5       |
| Table S6. Thermodynamic and reactivity parameters of L1, complex 1 and complex 2... .. | S6       |
| Table S7. Cathodic and Anodic potential and current for complexes 1 & 2 .....          | S6       |
| Table S8. DPPH radical scavenging activity of ligand L1, complex 1 and complex 2.....  | S6       |
| Table S9. Antibacterial activity of ligand L1 and its metal complexes 1 and 2.....     | S7       |
| Table S10: Minimum inhibition concentration values of L1 and complexes 1 & 2.....      | S7       |
| Table S11. Percent cell viability of L1 and complexes 1 & 2 against A549.....          | S7       |
| Table S12. Percent cell viability of L1 and complexes 1 & 2 against MDA-MB-231.....    | S8       |
| Table S13: Comparison table of IC <sub>50</sub> values of complex 2.....               | S8       |

#### LIST OF FIGURES

| Title                                                                         | Page No. |
|-------------------------------------------------------------------------------|----------|
| Figure S1. Solution stability studies of complexes 1 & 2.....                 | S9       |
| Figure S2. Comparative UV–vis spectra of ligand (L1) and complexes 1 & 2..... | S9       |
| Figure S3. FTIR spectra of ligand L1 and complexes 1 & 2.....                 | S10      |
| Figure S4. <sup>1</sup> HNMR spectra of ligand L1.....                        | S10      |

|                                                                                                             |     |
|-------------------------------------------------------------------------------------------------------------|-----|
| <b>Figure S5.</b> $^{13}\text{C}$ NMR spectra of ligand <b>L1</b> .....                                     | S11 |
| <b>Figure S6.</b> $^1\text{H}$ NMR spectra of complex <b>2</b> .....                                        | S11 |
| <b>Figure S7.</b> $^{13}\text{C}$ NMR spectra of complex <b>2</b> .....                                     | S11 |
| <b>Figure S8.</b> EPR spectra of complex <b>1</b> .....                                                     | S12 |
| <b>Figure S9.</b> Single XRD structure of ligand <b>L1</b> .....                                            | S12 |
| <b>Figure S10.</b> Single XRD image illustrating dihedral angle between two planes.....                     | S12 |
| <b>Figure S11.</b> FMOs of ligand <b>L1</b> generated at B3LYP functional.....                              | S13 |
| <b>Figure S12.</b> FMOs of complex <b>1</b> generated at B3LYP functional.....                              | S13 |
| <b>Figure S13.</b> FMOs of complex <b>2</b> generated at B3LYP functional.....                              | S14 |
| <b>Figure S14.</b> 3D Hirshfeld surface mapping of <b>L1</b> .....                                          | S14 |
| <b>Figure S15.</b> 3D Hirshfeld surface mapping of complex <b>2</b> .....                                   | S14 |
| <b>Figure S16.</b> 2D fingerprint plots of <b>L1</b> and complexes <b>1</b> & <b>2</b> .....                | S15 |
| <b>Figure S17.</b> Emission spectra of complexes <b>1</b> & <b>2</b> .....                                  | S15 |
| <b>Figure S18.</b> Emission spectra of EB–DNA system recorded in Tris-HCl buffer.....                       | S16 |
| <b>Figure S19.</b> Cyclic voltammogram curves of complexes <b>1</b> and <b>2</b> .....                      | S16 |
| <b>Figure S20.</b> CD spectra of ct-DNA of complexes <b>1</b> and <b>2</b> .....                            | S16 |
| <b>Figure S21.</b> Emission spectra of BSA of complex <b>1</b> and <b>2</b> .....                           | S17 |
| <b>Figure S22.</b> CD spectrum of BSA alone in the presence and absence complex <b>1</b> and <b>2</b> ..... | S17 |
| <b>Figure S23.</b> Molecular docked structure of <b>L1</b> with DNA.....                                    | S18 |
| <b>Figure S24.</b> Molecular docked structure of complex <b>2</b> with DNA.....                             | S18 |
| <b>Figure S25.</b> Molecular docked structure of <b>L1</b> with BSA.....                                    | S19 |
| <b>Figure S26.</b> Molecular docked structure of complex <b>1</b> with BSA.....                             | S19 |
| <b>Figure S27.</b> Antibacterial action of control, <b>L1</b> and complexes <b>1</b> & <b>2</b> .....       | S20 |
| <b>References</b> .....                                                                                     | S20 |

**TABLES**

**Table S1:** Crystallographic data and structure refinement details of **L1**.

| <b>Parameters</b>                        | <b>L1</b>                                                     |
|------------------------------------------|---------------------------------------------------------------|
| Empirical formula                        | C <sub>15</sub> H <sub>12</sub> N <sub>4</sub> O              |
| CCDC No.                                 | 2191272                                                       |
| Formula weight                           | 282.30                                                        |
| Temperature/K                            | 293                                                           |
| Crystal system                           | monoclinic                                                    |
| Space group                              | P2 <sub>1</sub> /c                                            |
| a/Å                                      | 7.1579(1)                                                     |
| b/Å                                      | 25.1674(3)                                                    |
| c/Å                                      | 7.9414(1)                                                     |
| α/°                                      | 90                                                            |
| β/°                                      | 104.060(1)                                                    |
| γ/°                                      | 90                                                            |
| Volume/Å <sup>3</sup>                    | 1387.75(3)                                                    |
| Z                                        | 4                                                             |
| ρ <sub>calc</sub> /g/cm <sup>3</sup>     | 1.351                                                         |
| μ/mm <sup>-1</sup>                       | 0.766                                                         |
| F(000)                                   | 594.0                                                         |
| Crystal size/mm <sup>3</sup>             | 0.28 × 0.21 × 0.16                                            |
| Radiation                                | Cu Kα (λ = 1.54184)                                           |
| 2θ range for data collection/°           | 7.02 to 136.06                                                |
| Index ranges                             | -6 ≤ h ≤ 8, -30 ≤ k ≤ 30, -9 ≤ l ≤ 9                          |
| Reflections collected                    | 11590                                                         |
| Independent reflections                  | 2532 [R <sub>int</sub> = 0.0376, R <sub>sigma</sub> = 0.0209] |
| Data/restraints/parameters               | 2532/0/194                                                    |
| Goodness-of-fit on F <sup>2</sup>        | 1.039                                                         |
| Final R indexes [I ≥ 2σ(I)]              | R <sub>1</sub> = 0.0410, wR <sub>2</sub> = 0.1184             |
| Final R indexes [all data]               | R <sub>1</sub> = 0.0434, wR <sub>2</sub> = 0.1206             |
| Largest diff. peak/hole/eÅ <sup>-3</sup> | 0.20/-0.18                                                    |

<sup>a</sup>GoF is defined as  $\{\sum[w(F_o^2 - F_c^2)]/(n - P)\}^{1/2}$  where  $n$  is the number of data and  $p$  is the number of parameters. <sup>b</sup>R =  $\{\sum||F_o| - |F_c||/\sum|F_o|\}$ ,  $wR^2 = \{\sum w(F_o^2 - F_c^2)^2/\sum w(F_o^2)\}^{1/2}$ .

**Table S2:** DFT calculated geometrical parameters of **L1** in comparison to experimental parameters (sXRD).

| <b>Bond angles (°)</b> |                            |                          |                   |                            |                          |
|------------------------|----------------------------|--------------------------|-------------------|----------------------------|--------------------------|
| <b>Atom-Atom-Atom</b>  |                            | <b>Experimental</b>      | <b>Calculated</b> |                            |                          |
| C12-N13-C14            |                            | 109.02(11)               | 109.05            |                            |                          |
| C10-N9-N8              |                            | 114.27(12)               | 114.30            |                            |                          |
| C1-N8-N9               |                            | 119.02(12)               | 119.09            |                            |                          |
| C19-C14-N13            |                            | 107.83(12)               | 107.89            |                            |                          |
| C4-C14-N13             |                            | 129.80(12)               | 129.83            |                            |                          |
| C4-C14-C19             |                            | 122.37(13)               | 122.39            |                            |                          |
| C11-C19-C14            |                            | 106.48(12)               | 106.48            |                            |                          |
| C18-C19-C14            |                            | 118.79(12)               | 118.79            |                            |                          |
| C18-C19-C11            |                            | 134.69(12)               | 134.60            |                            |                          |
| C12-C11-C19            |                            | 109.02(11)               | 109.05            |                            |                          |
| <b>Bond length (Å)</b> |                            |                          |                   |                            |                          |
| <b>Atom-Atom</b>       | <b>Experimental values</b> | <b>Calculated values</b> | <b>Atom-Atom</b>  | <b>Experimental values</b> | <b>Calculated values</b> |
| N13-C14                | 1.3790(18)                 | 1.378                    | C14-C19           | 1.4097(18)                 | 1.410                    |
| N13-C12                | 1.3510(19)                 | 1.349                    | C14-C4            | 1.3916(19)                 | 1.396                    |
| O7-C1                  | 1.2244(18)                 | 1.223                    | C19-C11           | 1.4395(19)                 | 1.440                    |
| N9-N8                  | 1.3952(16)                 | 1.395                    | C14-C4            | 1.3988(19)                 | 1.398                    |
| N9-C10                 | 1.2783(19)                 | 1.279                    | C19-C11           | 1.4383(19)                 | 1.438                    |
| N8-C1                  | 1.3380(19)                 | 1.339                    | C19-C18           | 1.4097(18)                 | 1.409                    |

**Table S3:** DFT calculated geometrical parameters of complex **1** in comparison to experimental parameters (sXRD).

| <b>Bond angles (°)</b>    |                            |                          |                   |                            |                          |
|---------------------------|----------------------------|--------------------------|-------------------|----------------------------|--------------------------|
| <b>Atom-Atom-Atom</b>     |                            | <b>Experimental</b>      | <b>Calculated</b> |                            |                          |
| O2Mn1O1                   |                            | 99.55(15)                | 99.57             |                            |                          |
| O3Mn1O1                   |                            | 89.45(15)                | 89.44             |                            |                          |
| O3Mn1O1                   |                            | 168.77(15)               | 168.75            |                            |                          |
| O3Mn1O2                   |                            | 90.58(16)                | 90.60             |                            |                          |
| O3Mn1O2                   |                            | 169.83(14)               | 169.83            |                            |                          |
| N3Mn1O1                   |                            | 78.76(15)                | 78.78             |                            |                          |
| N3Mn1O2                   |                            | 90.90(15)                | 90.96             |                            |                          |
| N3Mn1O3                   |                            | 96.36(15)                | 96.39             |                            |                          |
| N3Mn1O3                   |                            | 95.51(15)                | 95.54             |                            |                          |
| N7Mn1O1                   |                            | 90.91(15)                | 90.93             |                            |                          |
| N7Mn1O2                   |                            | 78.39(16)                | 78.38             |                            |                          |
| N7Mn1O3                   |                            | 95.91(15)                | 95.97             |                            |                          |
| N7Mn1O3                   |                            | 96.88(16)                | 96.79             |                            |                          |
| N7Mn1N3                   |                            | 163.78(19)               | 163.79            |                            |                          |
| <b>Bond distances (Å)</b> |                            |                          |                   |                            |                          |
| <b>Atom-Atom</b>          | <b>Experimental values</b> | <b>Calculated values</b> | <b>Atom-Atom</b>  | <b>Experimental values</b> | <b>Calculated values</b> |
| Mn1-O1                    | 1.952(3)                   | 1.953                    | O1-C6             | 1.308(5)                   | 1.305                    |
| Mn1-O3                    | 1.969(4)                   | 1.958                    | O2-C21            | 1.306(5)                   | 1.297                    |
| Mn1-O3                    | 1.831(4)                   | 1.836                    | N1-C1             | 1.333(11)                  | 1.332                    |
| Mn1-N3                    | 1.820(3)                   | 1.822                    | N1-C5             | 1.321(9)                   | 1.329                    |
| Mn1-N7                    | 1.987(4)                   | 1.984                    | N2-N3             | 1.393(6)                   | 1.395                    |

**Table S4:** DFT calculated geometrical parameters of complex **2** in comparison to experimental parameters (sXRD).

| <b>Bond angles (°)</b>    |                            |                          |                   |                            |                          |
|---------------------------|----------------------------|--------------------------|-------------------|----------------------------|--------------------------|
| <b>Atom-Atom-Atom</b>     |                            | <b>Experimental</b>      | <b>Calculated</b> |                            |                          |
| O1-Zn1-O1                 |                            | 180.0                    | 180.00            |                            |                          |
| N1-Zn1-O1                 |                            | 101.23(17)               | 101.28            |                            |                          |
| N1-Zn1-O1                 |                            | 78.77(17)                | 78.79             |                            |                          |
| N1-Zn1-N1                 |                            | 180.0                    | 180.0             |                            |                          |
| N1-Zn1-O1                 |                            | 88.36(17)                | 88.36             |                            |                          |
| N2-Zn1-O1                 |                            | 91.64(17)                | 91.64             |                            |                          |
| N2-Zn1-O1                 |                            | 91.64(17)                | 91.66             |                            |                          |
| N1-Zn1-O1                 |                            | 88.36(17)                | 88.38             |                            |                          |
| <b>Bond distances (Å)</b> |                            |                          |                   |                            |                          |
| <b>Atom-Atom</b>          | <b>Experimental values</b> | <b>Calculated values</b> | <b>Atom-Atom</b>  | <b>Experimental values</b> | <b>Calculated values</b> |
| Zn1-O1                    | 2.060(4)                   | 2.062                    | N2-N5             | 1.401(11)                  | 1.401                    |
| Zn1-O1                    | 2.060(4)                   | 2.120                    | N2-C4             | 1.03(4)                    | 1.032                    |
| Zn1-N1                    | 2.069(5)                   | 2.072                    | N2-C3             | 1.24(4)                    | 1.233                    |
| Zn1-N1                    | 2.069(5)                   | 2.069                    | O1-C18            | 1.268(6)                   | 1.261                    |
| Zn1-N2                    | 2.343(5)                   | 2.340                    | N1-N2             | 1.410(6)                   | 1.414                    |
| Zn1-N2                    | 2.343(5)                   | 2.344                    | N1-C15            | 1.269(8)                   | 1.272                    |

**Table S5:** Energy of various FMOs of **L1**, complex **1** and complex **2** and their respective HOMO-LUMO energy gaps.

| <b>L1</b>        |                    |              |                    |           |
|------------------|--------------------|--------------|--------------------|-----------|
| <b>FMO's</b>     | <b>Energy (eV)</b> | <b>FMO's</b> | <b>Energy (eV)</b> | <b>ΔE</b> |
| HOMO             | -3.679             | LUMO         | -1.563             | 2.116     |
| HOMO-1           | -3.373             | LUMO+1       | -0.854             | 2.519     |
| HOMO-2           | -3.701             | LUMO+2       | -0.522             | 3.179     |
| HOMO-3           | -3.922             | LUMO+3       | -0.196             | 3.726     |
| HOMO-4           | -4.038             | LUMO+4       | -0.548             | 3.490     |
| <b>Complex 1</b> |                    |              |                    |           |
| HOMO             | -4.243             | LUMO         | -2.805             | 1.438     |
| HOMO-1           | -4.386             | LUMO+1       | -2.627             | 1.759     |
| HOMO-2           | -4.585             | LUMO+2       | -2.061             | 2.524     |
| HOMO-3           | -4.890             | LUMO+3       | -1.974             | 2.916     |
| HOMO-4           | -5.217             | LUMO+4       | -1.587             | 3.630     |
| <b>Complex 2</b> |                    |              |                    |           |
| HOMO             | -3.929             | LUMO         | -2.677             | 1.252     |
| HOMO-1           | -3.994             | LUMO+1       | -2.630             | 1.364     |
| HOMO-2           | -4.147             | LUMO+2       | -2.100             | 2.047     |
| HOMO 3           | -4.569             | LUMO+3       | -1.733             | 2.836     |
| HOMO 4           | -4.742             | LUMO+4       | -1.698             | 3.044     |

**Table S6:** Thermodynamic and reactivity parameters of **L1** and complexes **1** & **2** by using B3LYP hybrid functional.

| Parameters       | L1     | Complex 1 | Complex 2 |
|------------------|--------|-----------|-----------|
| LUMO energy (eV) | -1.563 | -2.805    | -2.677    |
| HOMO energy (eV) | -3.679 | -4.243    | -3.929    |
| LUMO–HOMO        | 2.116  | 1.438     | 1.252     |
| $\chi$ (eV)      | 2.621  | 3.524     | 3.303     |
| $\mu$ (eV)       | -2.621 | -3.524    | -3.303    |
| $\eta$ (eV)      | 1.058  | 0.719     | 0.626     |
| $\omega$ (eV)    | 3.247  | 8.636     | 8.714     |

**Table S7:** Electrode (cathode and anode) potential (mV) and current (A) for the redox couples of complexes **1** & **2** with ct-DNA in 5mM Tris-buffer solution (pH 7.3) at a scan rate of 100mV s<sup>-1</sup>

| Complexes | Complex Alone      |                                  | Complex + ct-DNA   |                                  | $\Delta E_{pa}$ | $\Delta E_{pc}$ |
|-----------|--------------------|----------------------------------|--------------------|----------------------------------|-----------------|-----------------|
|           | Potential (mV)     | Current (A)                      | Potential (mV)     | Current (A)                      |                 |                 |
| <b>1</b>  | $E_{pa} = 596$     | $I_{pa} = 1.036 \times 10^{-5}$  | $E_{pa} = 535$     | $I_{pa} = 1.838 \times 10^{-5}$  | -61             | -38             |
|           | $E_{pc} = 620$     | $I_{pc} = -1.370 \times 10^{-5}$ | $E_{pc} = 582$     | $I_{pc} = -1.556 \times 10^{-5}$ |                 |                 |
|           | $E_{1/2} = 608$    | $I_{pa}/I_{pc} = 0.756$          | $E_{1/2} = 559$    | $I_{pa}/I_{pc} = 1.18$           |                 |                 |
|           | $\Delta E_p = -24$ |                                  | $\Delta E_p = -47$ |                                  |                 |                 |
| <b>2</b>  | $E_{pa} = 650$     | $I_{pa} = 0.906 \times 10^{-5}$  | $E_{pa} = 618$     | $I_{pa} = 1.007 \times 10^{-5}$  | -32             | -11             |
|           | $E_{pc} = 614$     | $I_{pc} = -1.094 \times 10^{-5}$ | $E_{pc} = 603$     | $I_{pc} = -1.352 \times 10^{-5}$ |                 |                 |
|           | $E_{1/2} = 632$    | $I_{pa}/I_{pc} = 0.828$          | $E_{1/2} = 611$    | $I_{pa}/I_{pc} = 0.744$          |                 |                 |
|           | $\Delta E_p = -36$ |                                  | $\Delta E_p = -15$ |                                  |                 |                 |

**Table S8:** DPPH radical scavenging activity of ligand **L1** and complexes **1** & **2** along with standard ascorbic acid (AA) at different concentrations ( $\lambda_{max} = 517$  nm). Data represent mean  $\pm$  SEM of at least three independent experiments ( $n \geq 3$ )

| Conc.                                    | % Inhibition |              |              |              |
|------------------------------------------|--------------|--------------|--------------|--------------|
|                                          | AA           | L1           | Complex 1    | Complex 2    |
| 5 $\mu$ M                                | 20.48        | 4.43         | 18.03        | 11.59        |
| 10 $\mu$ M                               | 32.55        | 8.64         | 24.69        | 16.64        |
| 15 $\mu$ M                               | 43.65        | 13.67        | 31.03        | 21.02        |
| 20 $\mu$ M                               | 51.02        | 19.66        | 44.88        | 36.55        |
| 25 $\mu$ M                               | 60.69        | 25.43        | 57.99        | 47.54        |
| 30 $\mu$ M                               | 67.64        | 35.54        | 63.95        | 56.65        |
| 35 $\mu$ M                               | 80.59        | 49.66        | 78.14        | 61.44        |
| <b>IC<sub>50</sub> <math>\mu</math>M</b> | <b>19.95</b> | <b>36.09</b> | <b>21.73</b> | <b>28.60</b> |

**Table S9:** Antibacterial activity of ligand **L1** and complexes **1** & **2** against gram positive and gram-negative bacteria.

| Compounds        | Max. inhibition zone, $x \pm SD$ (mm) |                    |                |                      |
|------------------|---------------------------------------|--------------------|----------------|----------------------|
|                  | Gram-positive                         |                    | Gram-negative  |                      |
|                  | <i>S. aureus</i>                      | <i>B. subtilis</i> | <i>E. coli</i> | <i>P. aeruginosa</i> |
| <b>L1</b>        | 6 $\pm$ 0.32                          | 9 $\pm$ 0.70       | 4 $\pm$ 0.43   | 5 $\pm$ 0.72         |
| <b>Complex 1</b> | 9 $\pm$ 0.64                          | 11 $\pm$ 0.33      | 3 $\pm$ 0.71   | 7 $\pm$ 0.63         |
| <b>Complex 2</b> | 16 $\pm$ 0.40                         | 13 $\pm$ 0.31      | 6 $\pm$ 0.64   | 9 $\pm$ 0.21         |

**Table S10:** Minimum inhibition concentration values of **L1** and complexes **1** & **2** against gram positive and gram-negative bacteria.

| Compounds        | Minimum inhibitory concentration (MIC) in mM |                    |                |                      |
|------------------|----------------------------------------------|--------------------|----------------|----------------------|
|                  | <i>S. aureus</i>                             | <i>B. subtilis</i> | <i>E. coli</i> | <i>P. aeruginosa</i> |
| <b>L1</b>        | 7.2                                          | 6.8                | 7.8            | 7.0                  |
| <b>Complex 1</b> | 5.5                                          | 5.9                | 8.2            | 6.5                  |
| <b>Complex 2</b> | 3.8                                          | 5.2                | 7.4            | 6.9                  |

**Table S11:** Percent cell viability of A549 (lung cancer) cell line in a dose dependent manner when treated with **L1** and complexes **1** & **2** along with control (DMSO). A one-way analysis of variance (ANOVA) was used to calculate the data, and then the Dunnet's multiple comparison test was performed. Data represent mean  $\pm$  SEM of three independent trials ( $n \geq 3$ ); \*p, \*\*p, \*\*\*p < 0.05, 0.01, and 0.001 vs control group.

| Sample           | Conc. ( $\mu$ M) | 1       | 2       | 3       | % Cell viability |
|------------------|------------------|---------|---------|---------|------------------|
| <b>L1</b>        | <b>Control</b>   | 106.219 | 97.509  | 99.577  | 101.101          |
|                  | <b>1</b>         | 107.034 | 107.970 | 114.867 | 109.957          |
|                  | <b>2.5</b>       | 116.496 | 116.496 | 112.235 | 115.075          |
|                  | <b>5</b>         | 116.935 | 112.549 | 113.865 | 114.449          |
|                  | <b>10</b>        | 117.311 | 113.927 | 114.303 | 115.180          |
|                  | <b>20</b>        | 126.084 | 116.371 | 112.674 | 118.376          |
| <b>Complex 1</b> | <b>Control</b>   | 106.219 | 97.509  | 99.577  | 101.101          |
|                  | <b>1</b>         | 119.818 | 112.486 | 117.875 | 116.726          |
|                  | <b>2.5</b>       | 117.875 | 120.282 | 115.932 | 118.029          |
|                  | <b>5</b>         | 112.737 | 116.935 | 103.713 | 111.128          |
|                  | <b>10</b>        | 113.614 | 111.797 | 103.023 | 109.478          |
|                  | <b>20</b>        | 87.169  | 79.711  | 76.390  | 81.090           |
| <b>Complex 2</b> | <b>Control</b>   | 106.509 | 100.598 | 97.642  | 101.583          |
|                  | <b>2.5</b>       | 113.687 | 114.637 | 110.520 | 112.948          |
|                  | <b>5</b>         | 76.002  | 77.797  | 80.752  | 78.850           |
|                  | <b>10</b>        | 59.007  | 65.974  | 80.964  | 51.981           |
|                  | <b>20</b>        | 46.023  | 45.812  | 41.907  | 44.580           |

**Table S12:** Percent cell viability of MDA–MB–231 (triple negative breast cancer) cell line in a dose dependent manner when treated with **L1** and complexes **1** & **2** along with control (DMSO). A one–way analysis of variance (ANOVA) was used to calculate the data, and then the Dunnet’s multiple comparison test was performed. Data represent mean ± SEM of three independent trials (n ≥ 3); \*p, \*\*p, \*\*\*p < 0.05, 0.01, and 0.001 vs control group.

| Sample           | Conc. (µM)     | 1       | 2       | 3       | % Cell viability |
|------------------|----------------|---------|---------|---------|------------------|
| <b>L1</b>        | <b>Control</b> | 103.181 | 101.616 | 96.920  | 100.572          |
|                  | <b>5</b>       | 98.621  | 96.647  | 113.731 | 102.999          |
|                  | <b>10</b>      | 93.312  | 104.066 | 103.250 | 100.209          |
|                  | <b>20</b>      | 102.501 | 101.412 | 101.003 | 101.638          |
| <b>Complex 1</b> | <b>Control</b> | 103.181 | 101.616 | 96.920  | 100.572          |
|                  | <b>5</b>       | 103.522 | 101.480 | 101.684 | 102.228          |
|                  | <b>10</b>      | 93.380  | 92.632  | 92.972  | 92.994           |
|                  | <b>20</b>      | 85.689  | 80.313  | 75.975  | 80.659           |
| <b>Complex 2</b> | <b>Control</b> | 103.181 | 101.616 | 96.920  | 100.572          |
|                  | <b>5</b>       | 104.611 | 103.590 | 104.407 | 104.202          |
|                  | <b>10</b>      | 98.009  | 100.459 | 98.281  | 98.916           |
|                  | <b>20</b>      | 72.962  | 80.517  | 73.711  | 75.73            |

**Table S13:** Comparison table of IC<sub>50</sub> values of complex **2** with some previously reported zinc hydrazone Schiff base complexes against A549 cancer cell line.

| S. No                                                                                                                              | Compound                                                | IC <sub>50</sub> (µM) | Reference    |
|------------------------------------------------------------------------------------------------------------------------------------|---------------------------------------------------------|-----------------------|--------------|
| <b>1</b>                                                                                                                           | Complex <b>2</b>                                        | 17.54                 | Present work |
| <b>2</b>                                                                                                                           | [Zn(L <sup>1</sup> )Cl <sub>2</sub> ].2H <sub>2</sub> O | 125.0                 | S1           |
| <b>3</b>                                                                                                                           | [Zn(L <sup>2</sup> )Cl <sub>2</sub> ]                   | 103.8                 | S1           |
| <b>4</b>                                                                                                                           | [Zn(L <sup>3</sup> )Cl <sub>2</sub> ]                   | 188.2                 | S1           |
| <b>5</b>                                                                                                                           | [ZnL <sup>5</sup> ]                                     | 18.2                  | S2           |
| <b>6</b>                                                                                                                           | [ZnL <sup>4</sup> (N <sub>3</sub> ) <sub>2</sub> ]      | ~400.0                | S3           |
| <b>7</b>                                                                                                                           | Cisplatin                                               | 30 ± 5.0              | S4           |
| Where L <sup>1</sup> , L <sup>2</sup> , L <sup>3</sup> , L <sup>4</sup> and L <sup>5</sup> are hydrazone–based Schiff base ligands |                                                         |                       |              |



## Figures

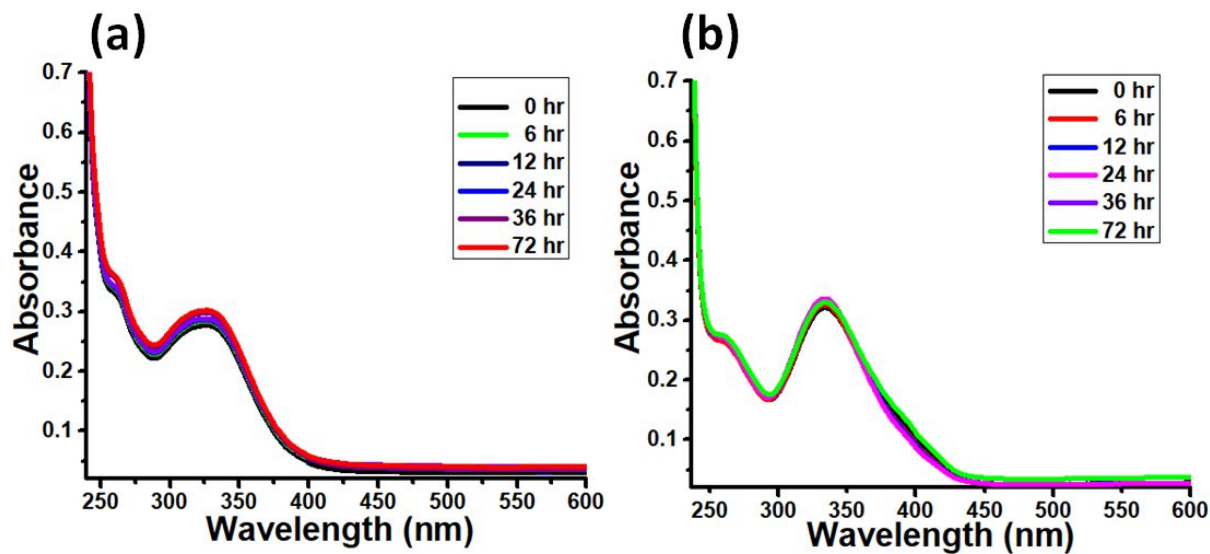

**Figure S1** Solution stability studies of (a) complex 1 & (b) complex 2 at varied time intervals using UV-vis spectroscopy.

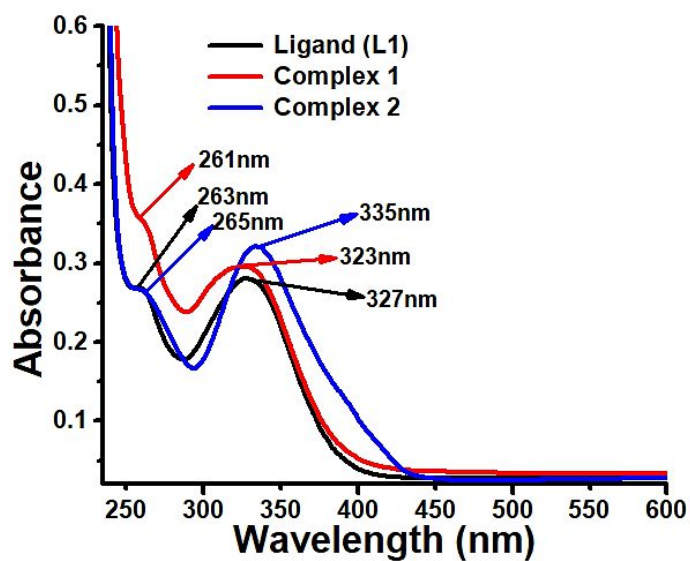

**Figure S2** Comparative UV-vis spectra of ligand (L1) and complexes 1 & 2.

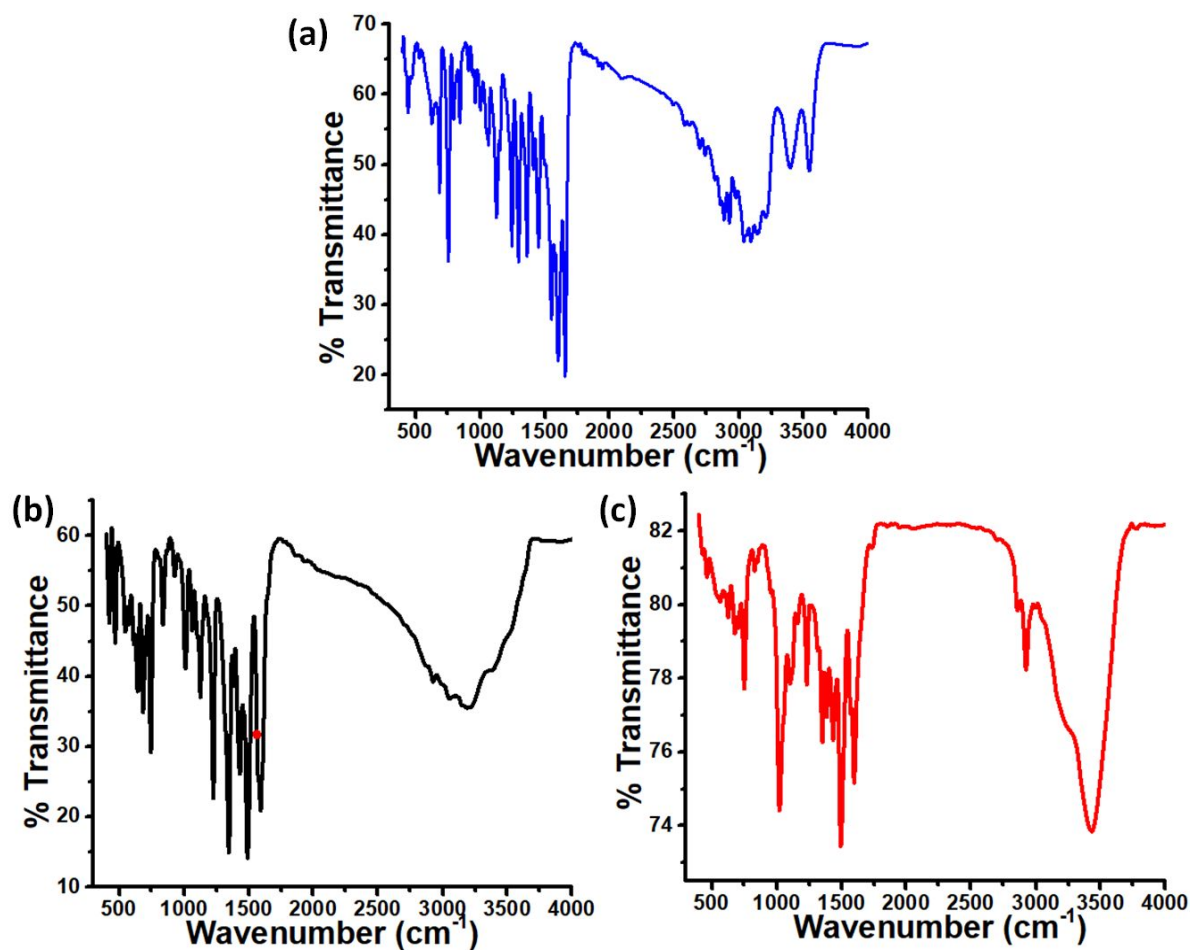

Figure S3 FTIR spectra of (a) ligand L1, (b) complex 1 and (c) complex 2.

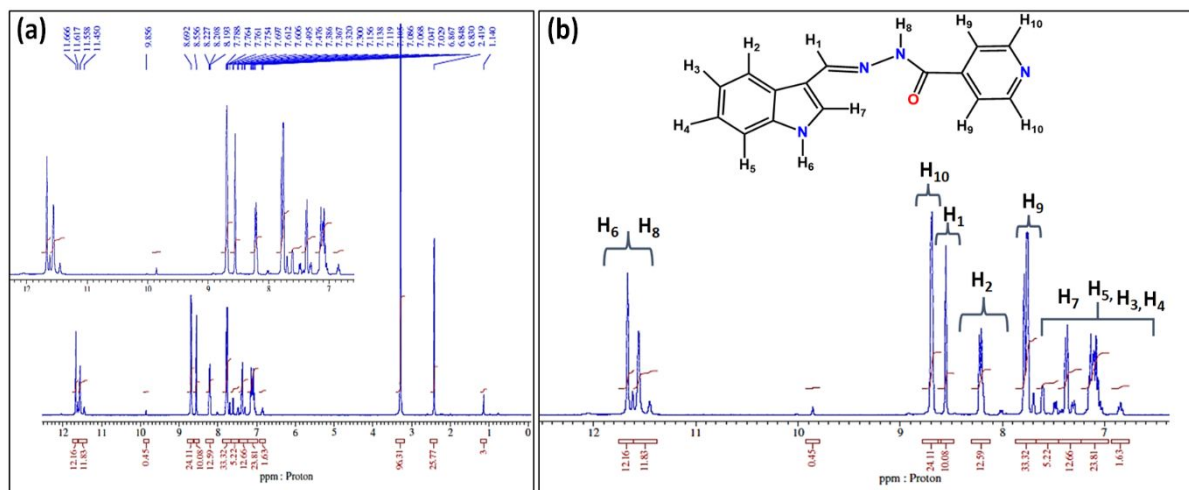

Figure S4 <sup>1</sup>H NMR spectra of ligand L1, (a) full view and (b) close view.

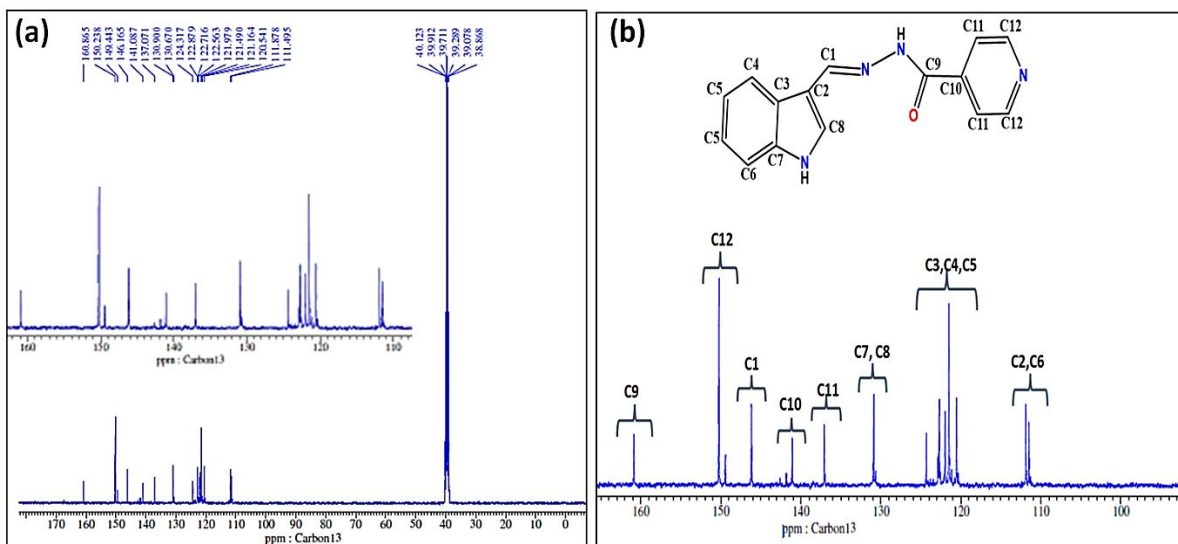

Figure S5  $^{13}\text{C}$  NMR of ligand L1 (a) full view and (b) close view.

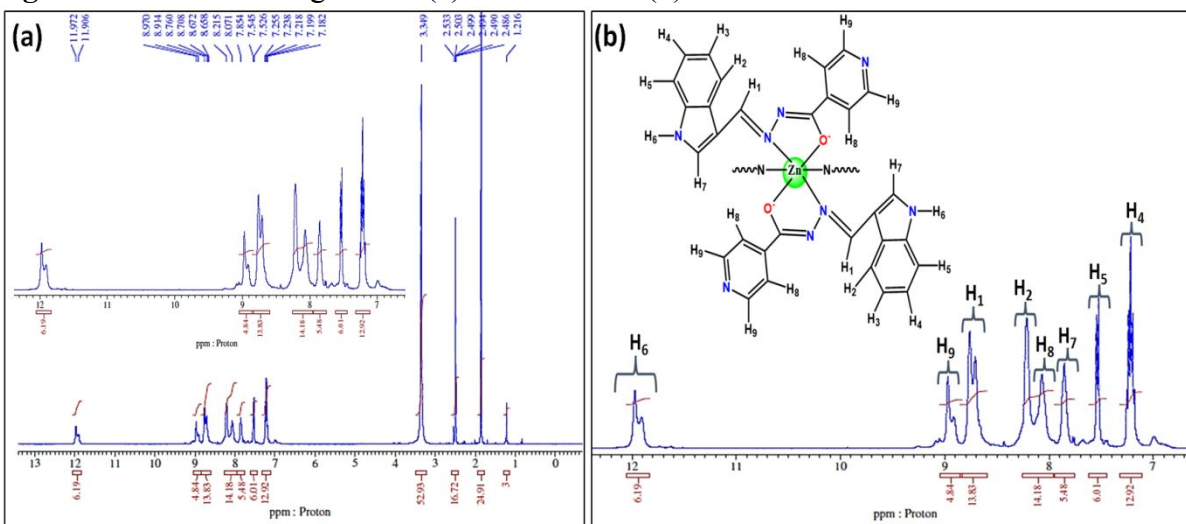

Figure S6  $^1\text{H}$  NMR of complex 2, (a) full view and (b) close view.

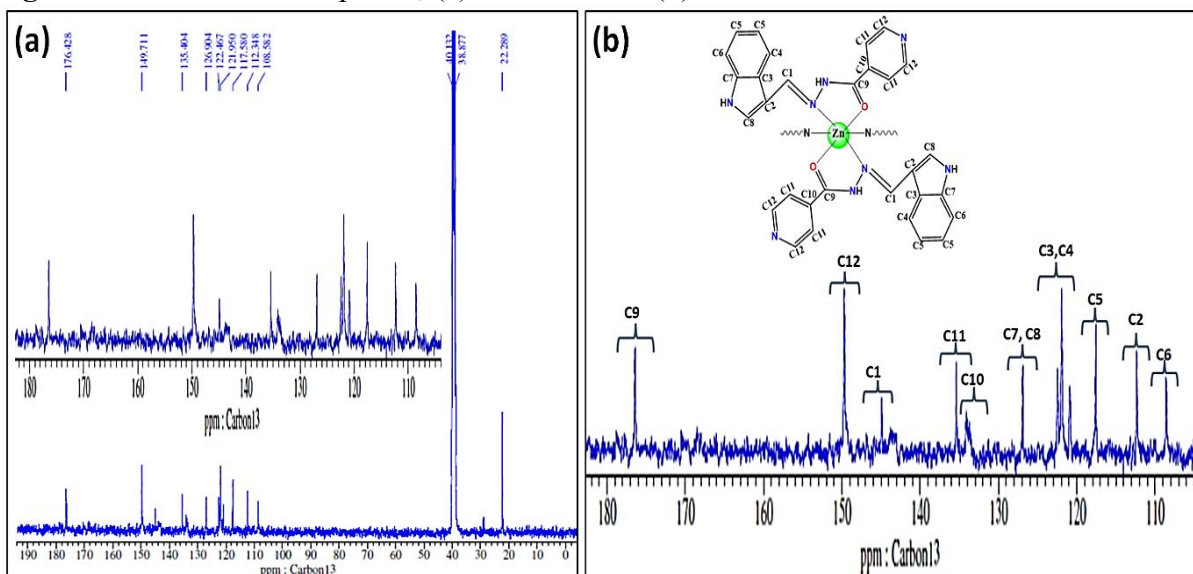

Figure S7  $^{13}\text{C}$  NMR of complex 2, (a) full view and (b) close view.

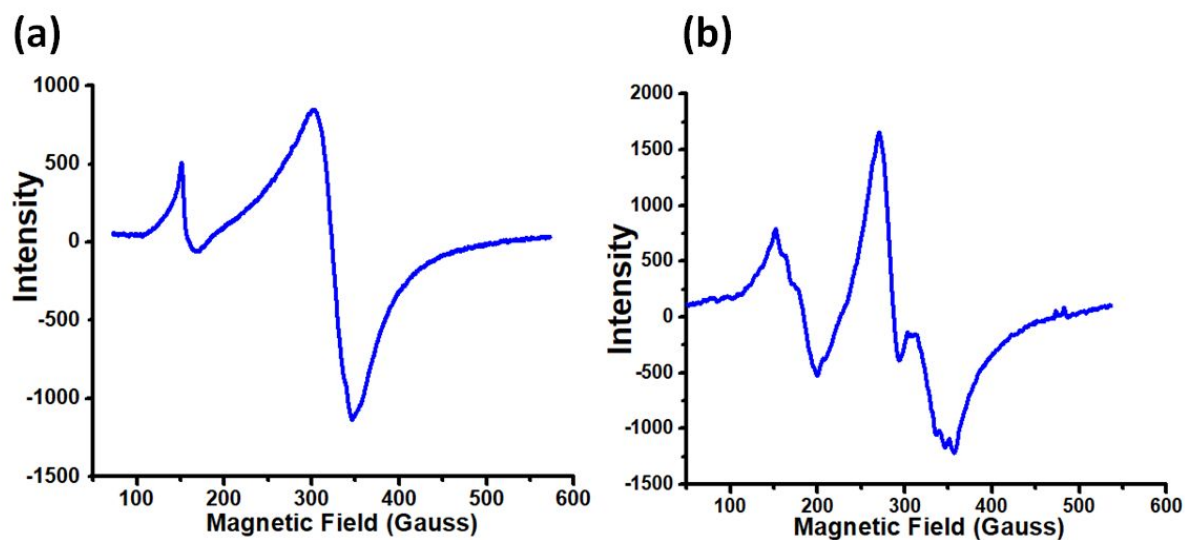

**Figure S8** EPR spectra of complex **1** at (a) RT and (b) LNT.

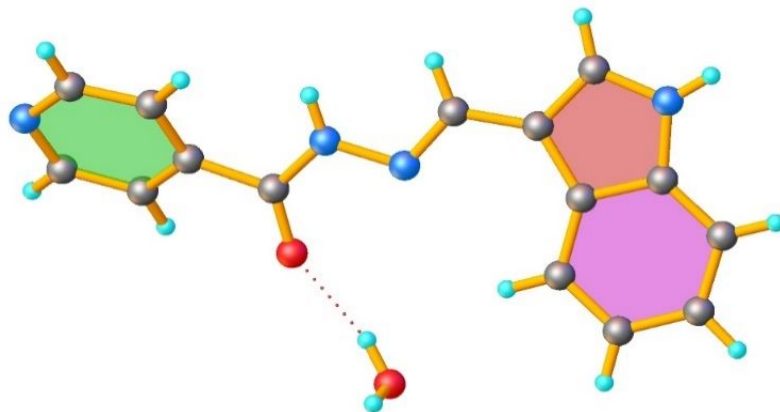

**Figure S9** Single crystal-XRD structure of Schiff base ligand **L1**.

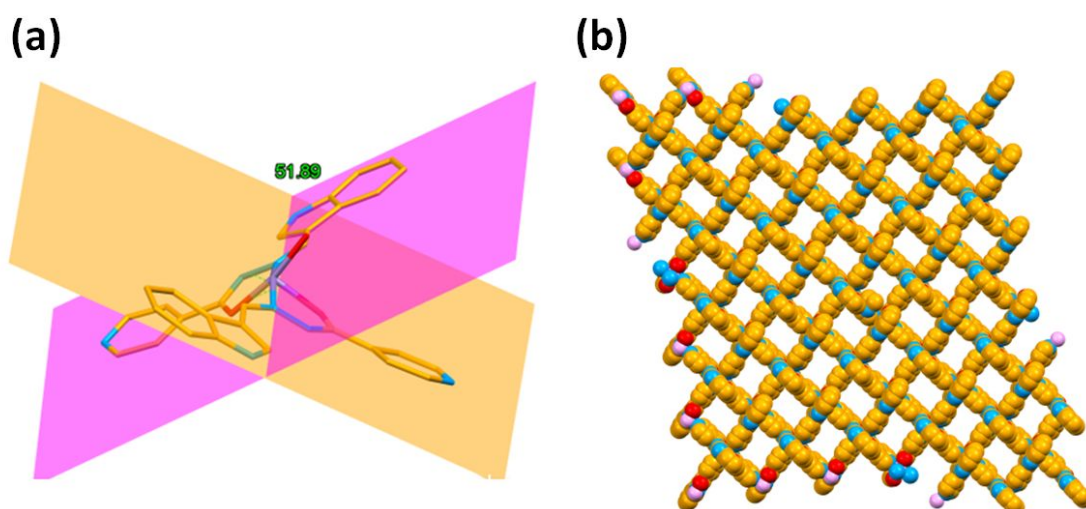

**Figure S10** (a) Single XRD image illustrating dihedral angle between two planes and (b) perspective view of a space filled model of complex **2** along 2D network.



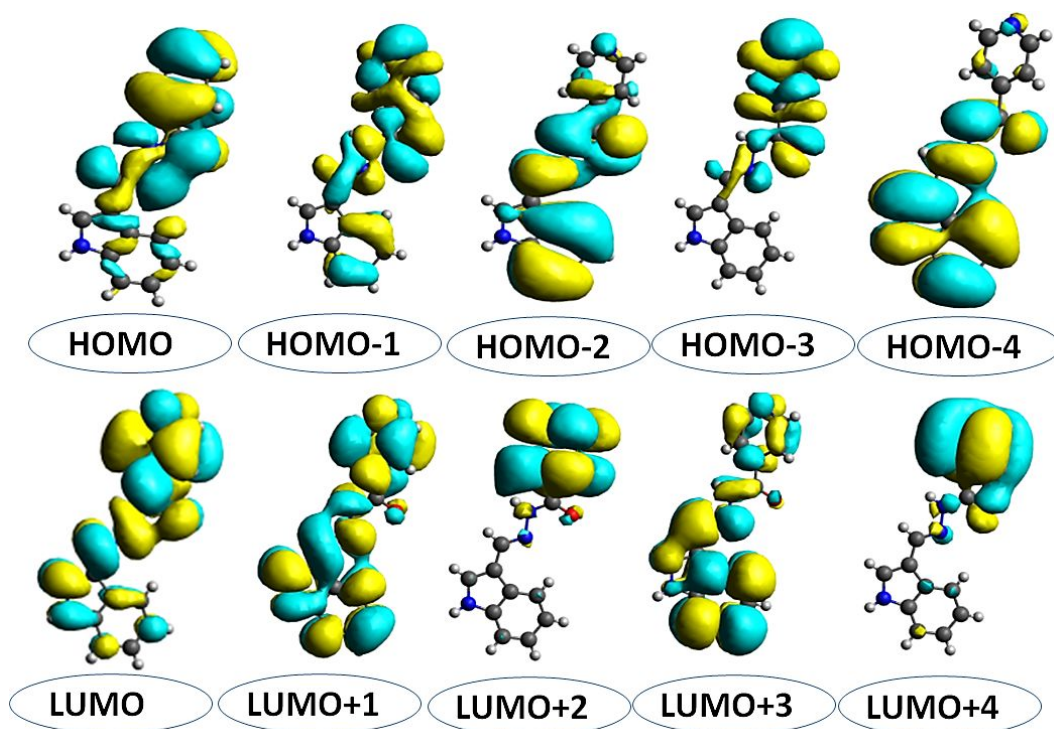

Figure S11 FMOs of ligand L1 generated at B3LYP functional.

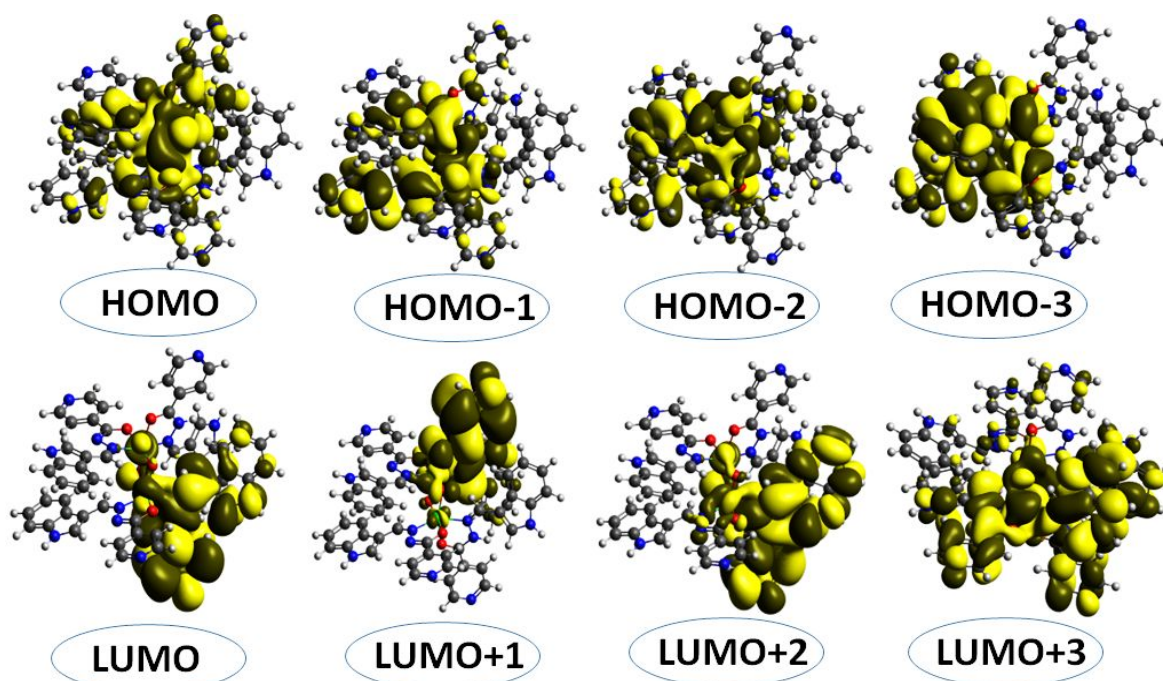

Figure S12 FMOs of complex 1 generated at B3LYP functional.

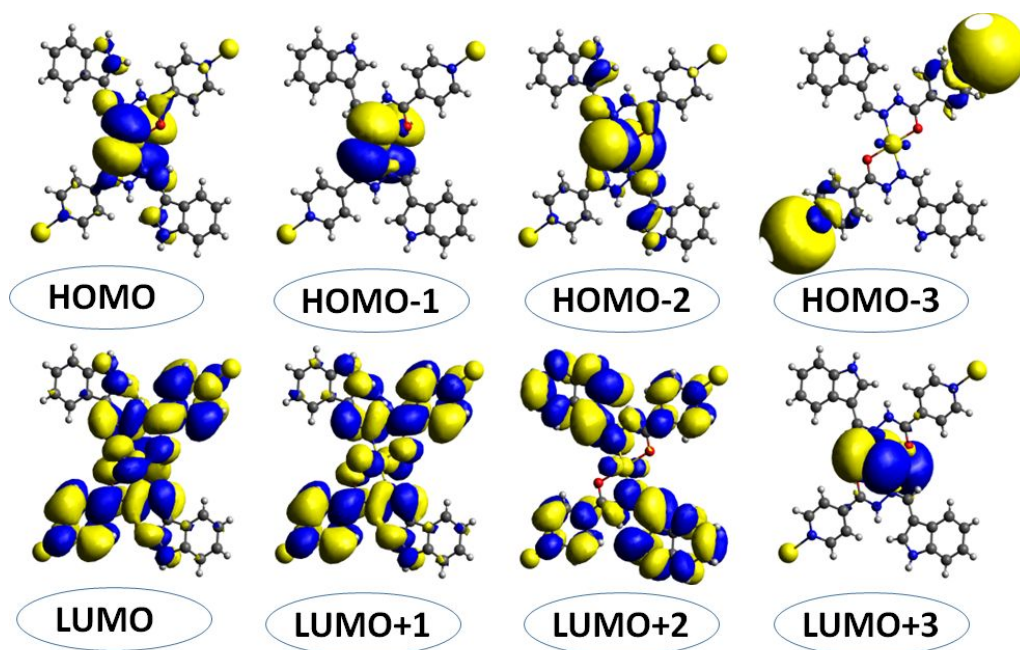

**Figure S13** FMOs of complex 2 generated at B3LYP functional.

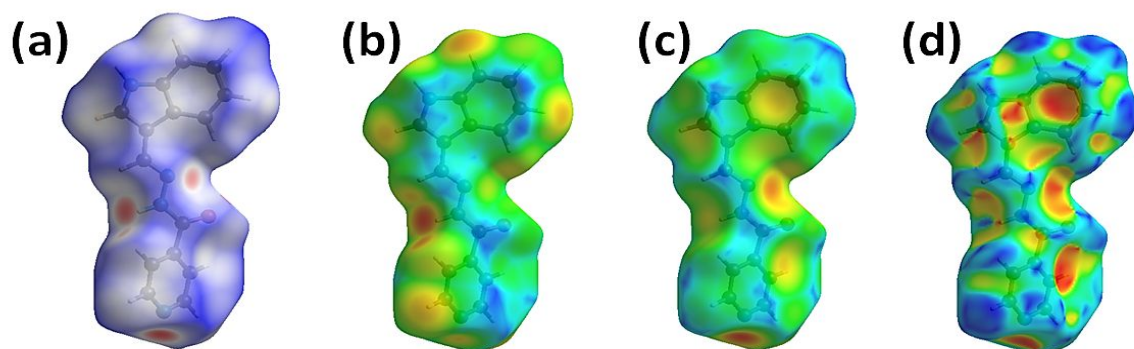

**Figure S14** 3D Hirshfeld surface mapping of L1 (a)  $d_{\text{norm}}$ , (b)  $d_e$  (c)  $d_i$  and (d) shape index

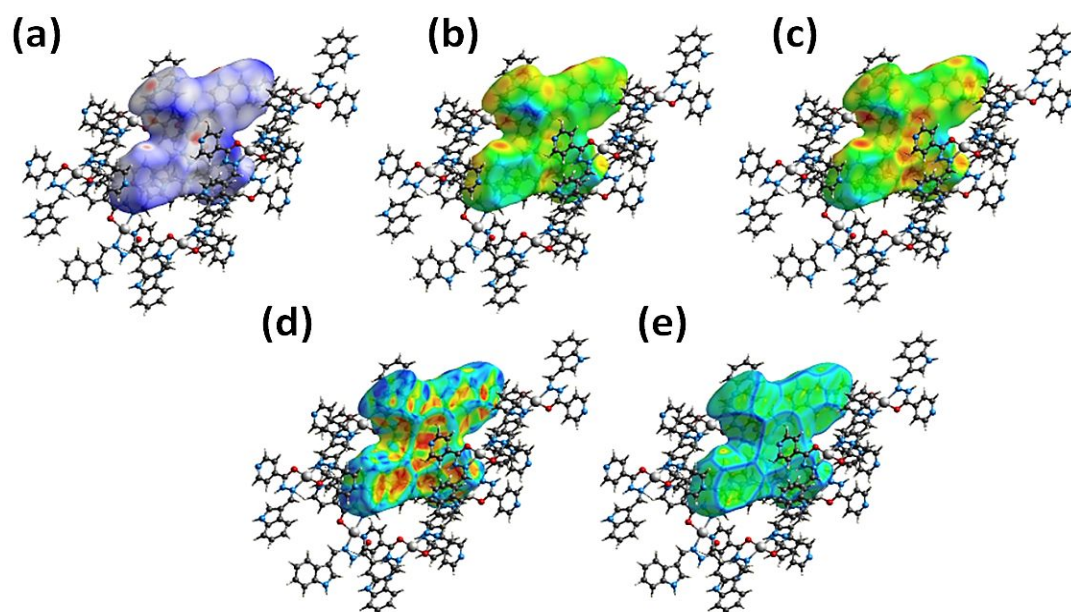

**Figure S15** 3D Hirshfeld surface of an asymmetric unit of complex 2 (a)  $d_{\text{norm}}$ , (b)  $d_e$  (c)  $d_i$  (d) shape index and (e) curvedness.



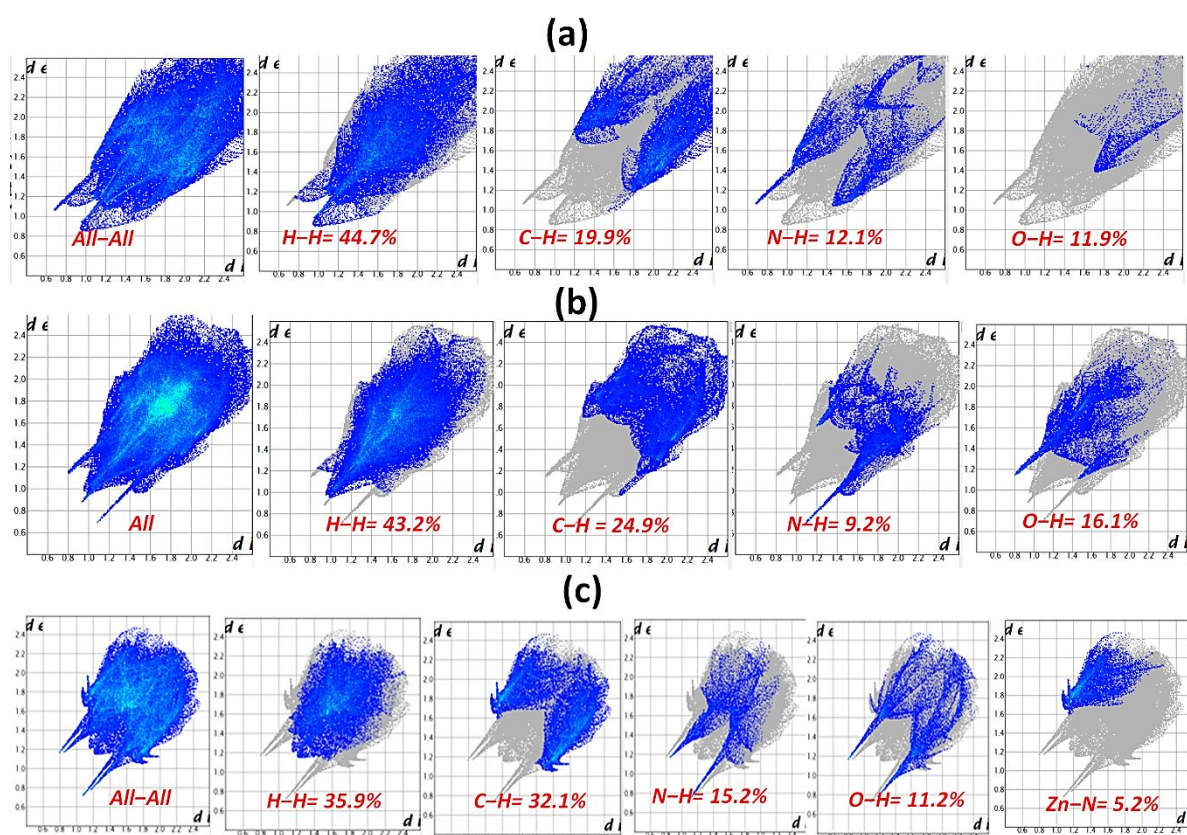

**Figure S16** 2D fingerprint plots of (a) L1, (b) complex 1 and (c) complex 2, illustrating the major contributions of various molecular contacts to the total Hirshfeld surface.

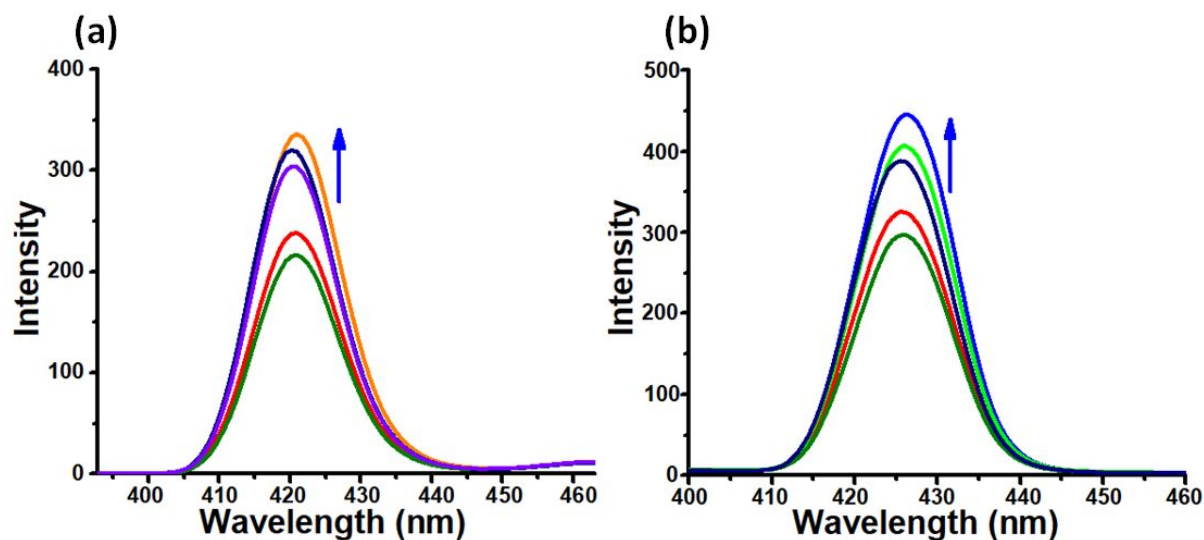

**Figure S17** Emission spectra of (a) complex 1 and (b) complex 2 in presence of increasing aliquots of ct-DNA. [complex 1] = [complex 2] =  $3 \times 10^{-6}$  M, [DNA] =  $0.1\text{--}0.5 \times 10^{-5}$  M

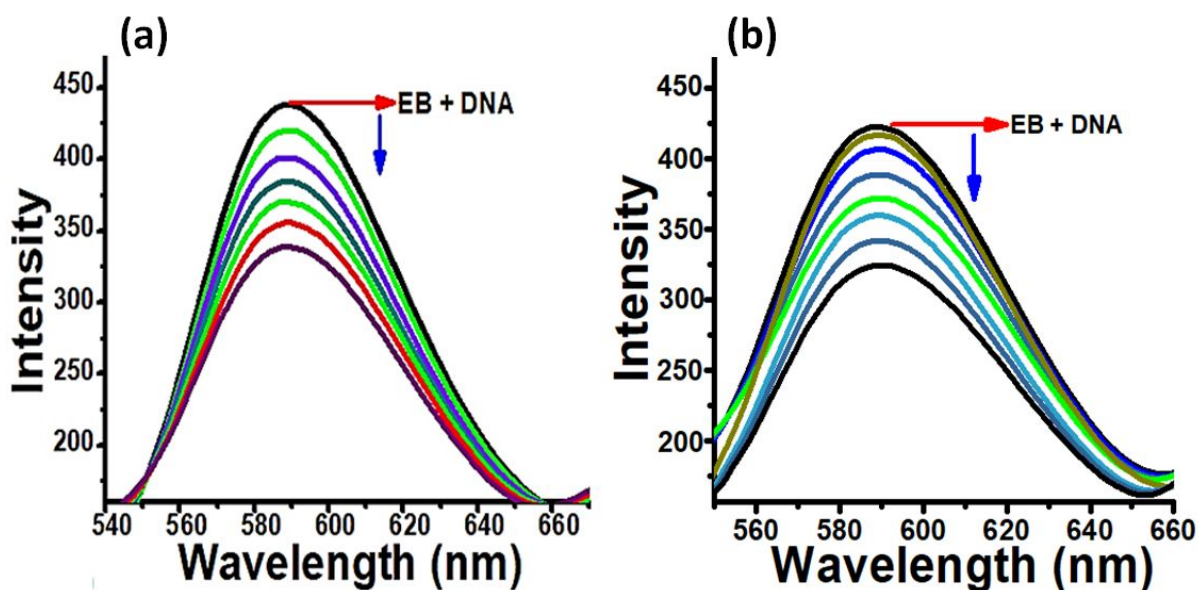

**Figure S18** Emission spectra of EB–DNA system recorded in Tris-HCl buffer at pH = 7.3 (a) in presence of complex 1 (b) in presence of complex 2. [EB] = [DNA] =  $2 \times 10^{-6}$  M.

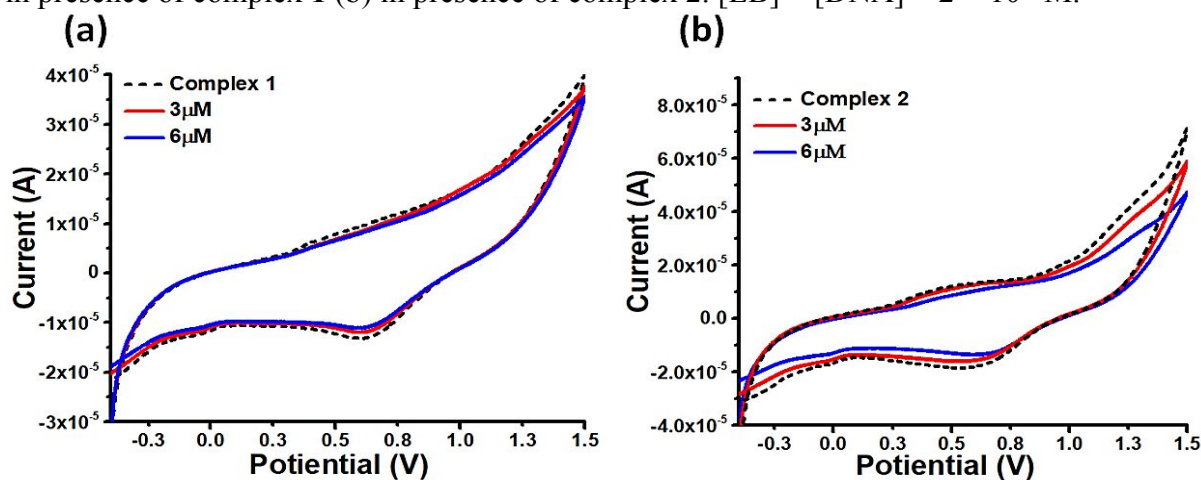

**Figure S19** Cyclic voltammogram curves of complexes (a) complex 1 and (b) complex 2 in presence of ct-DNA in Tris HCl buffer of pH=7.3. [Complex 1] = [Complex 2] =  $3 \times 10^{-6}$  M, [DNA]  $0.3\text{--}0.6 \times 10^{-5}$  M. Scan rate =  $100 \text{ mVs}^{-1}$ .

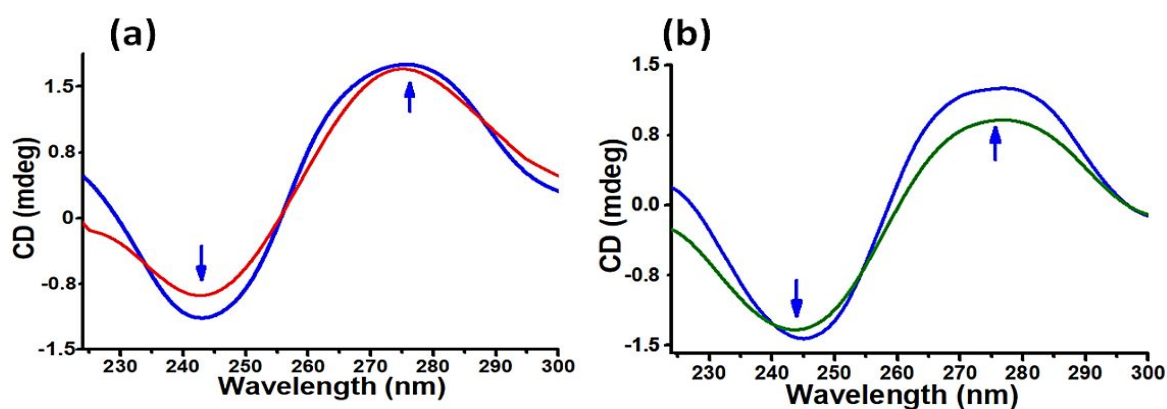

**Figure S20** CD spectra of ct-DNA (red), (a) ct-DNA + complex 1 (blue) and (b) ct-DNA + complex 2 (blue) in Tris-HCl buffer (pH=7.3). [DNA] =  $0.4 \times 10^{-5}$  M and [complex 1] = [complex 2] =  $2 \times 10^{-5}$  M.



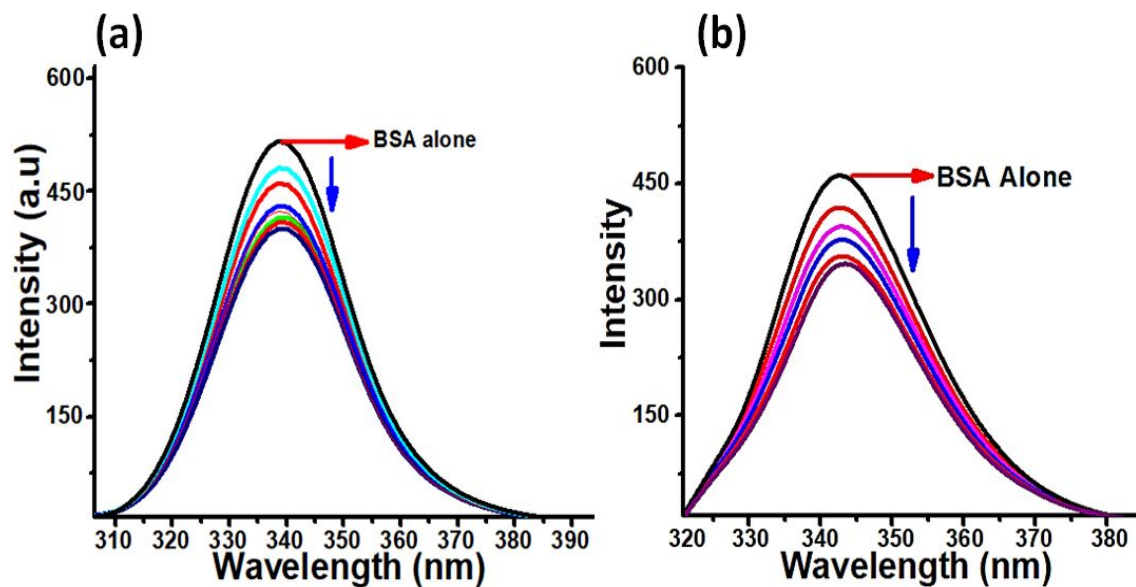

**Figure S21** Emission spectra of BSA in the presence and absence of (a) complex 1 and (b) complex 2. Arrows indicate quenching of emission maxima in presence of complexes 1 & 2.  $[BSA] = 3 \times 10^{-5} M$ ,  $[complex\ 1] = [complex\ 2] = 0.1-0.6 \times 10^{-5} M$ .

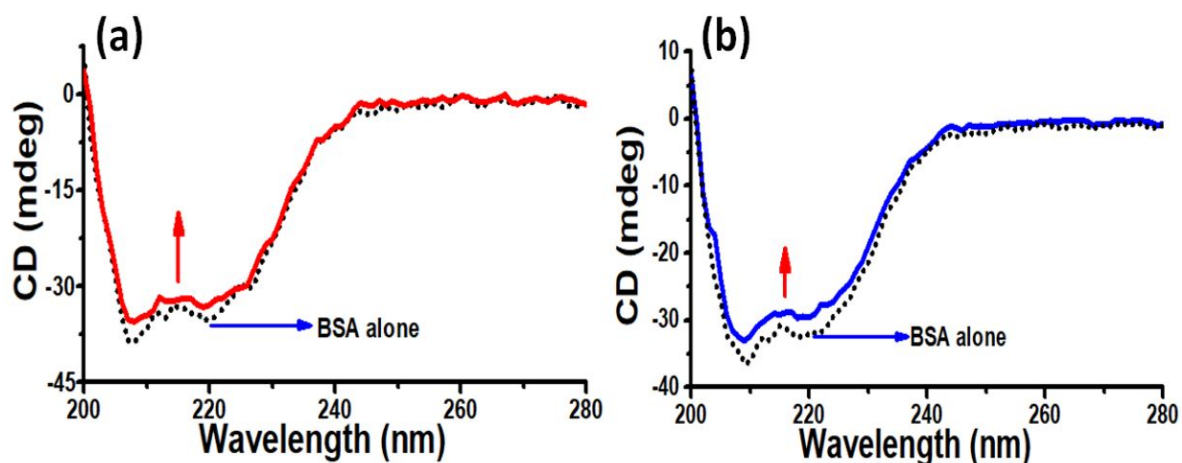

**Figure S22** CD spectrum of BSA alone (dotted line) in the presence and absence of (a) complex 1 (red) and (b) complex 2 (blue).  $[BSA] = 3 \times 10^{-6} M$  and  $[complex] = 0.2 \times 10^{-5} M$ .

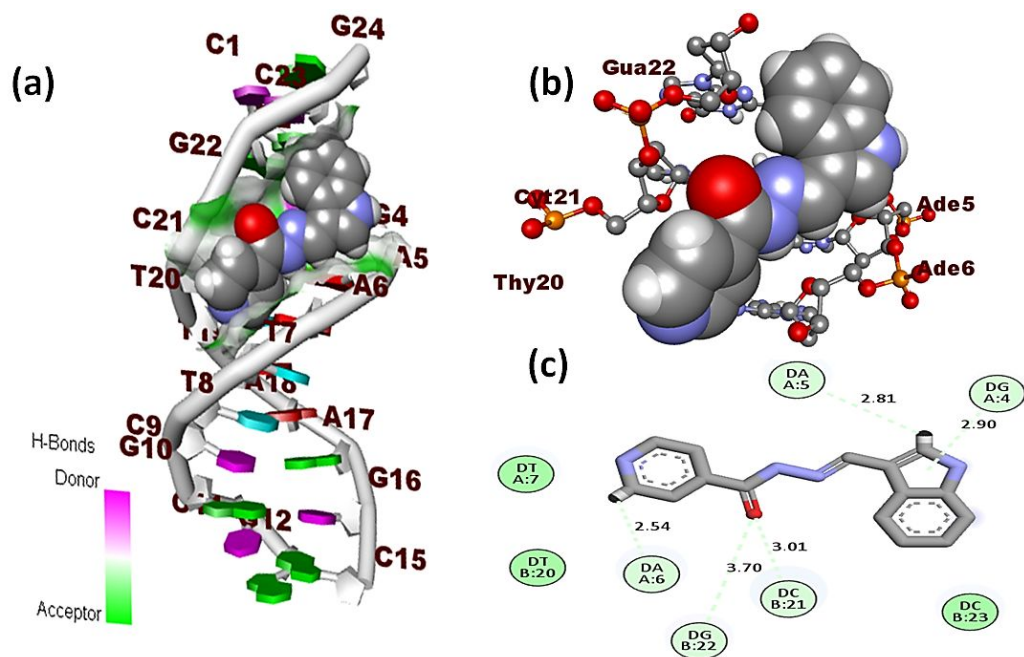

**Figure S23** Molecular docked structure of L1 (a) fitted inside the DNA dodecamer duplex of sequence  $d(\text{CGCGAATTCGCG})_2$  (PDB ID: 1BNA); (b) ligand nucleotide interaction in 3D view (c) interaction with different nucleotides in 2D view.

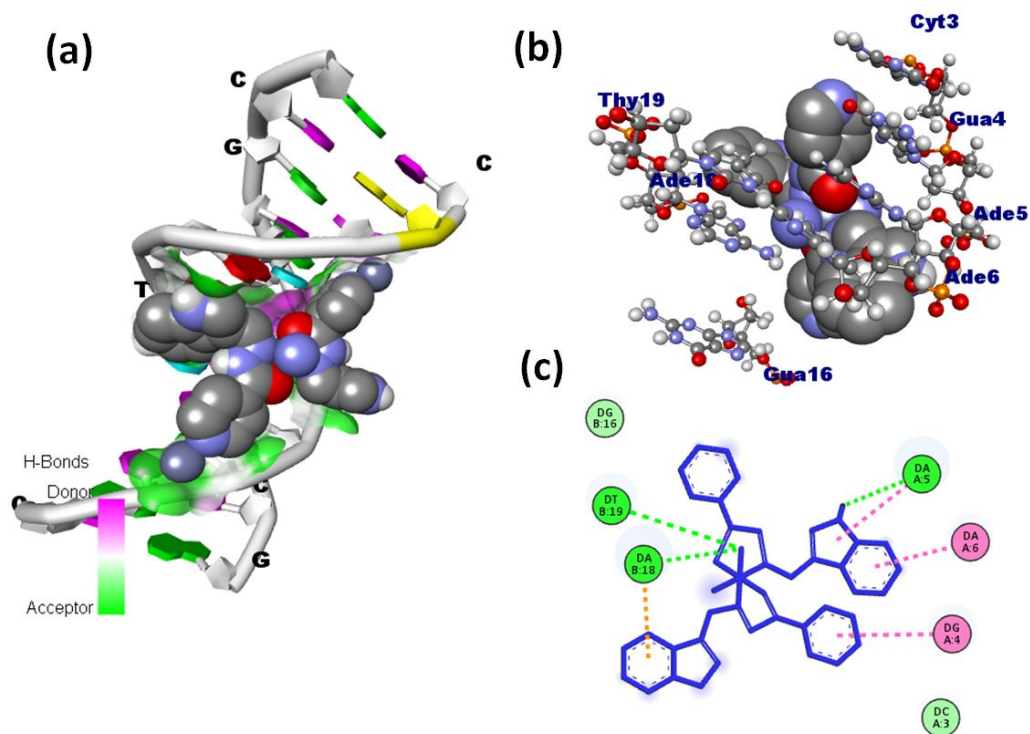

**Figure S24** Molecular docked structure of complex 2 (a) fitted inside the DNA dodecamer duplex of sequence  $d(\text{CGCGAATTCGCG})_2$  (PDB ID: 1BNA); (b) ligand nucleotide interaction (c) interaction with different nucleotides in 2D view.

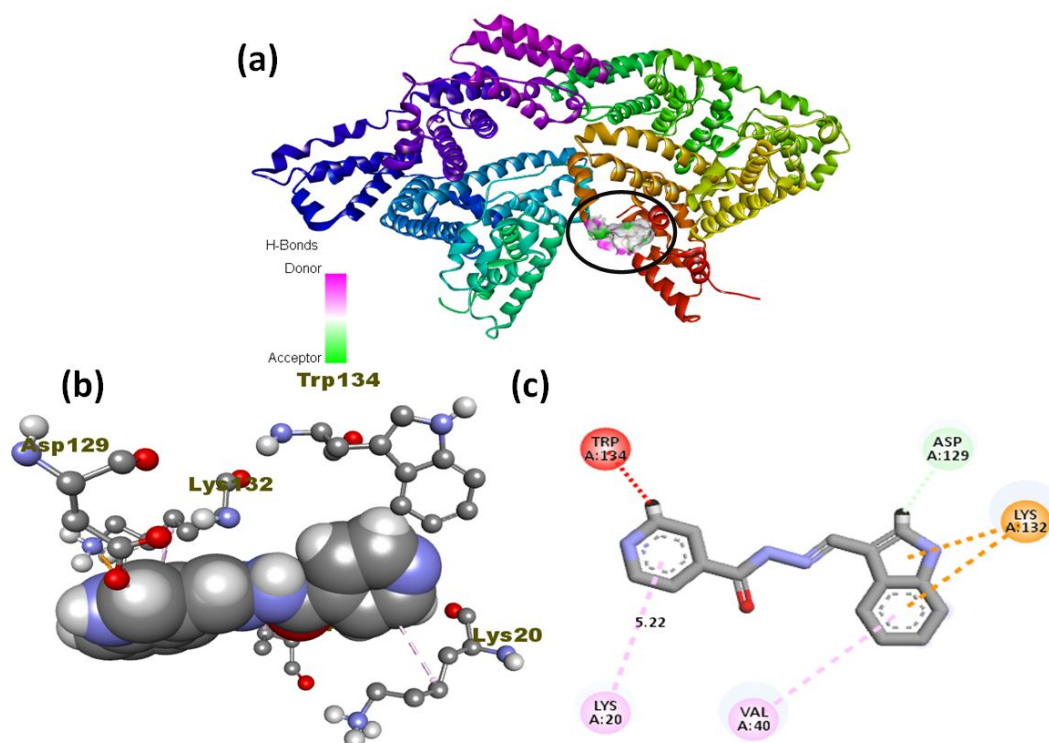

**Figure S25** (a) Molecular docked model poses of **L1** located within the hydrophobic pocket in subdomain IIA of BSA stabilized by intricate hydrogen bonding interactions and van der Waals forces, (b) interaction of **L1** with amino acid residues showed in 3D view and (c) interaction of **L1** with amino acid residues showed in 2D view.

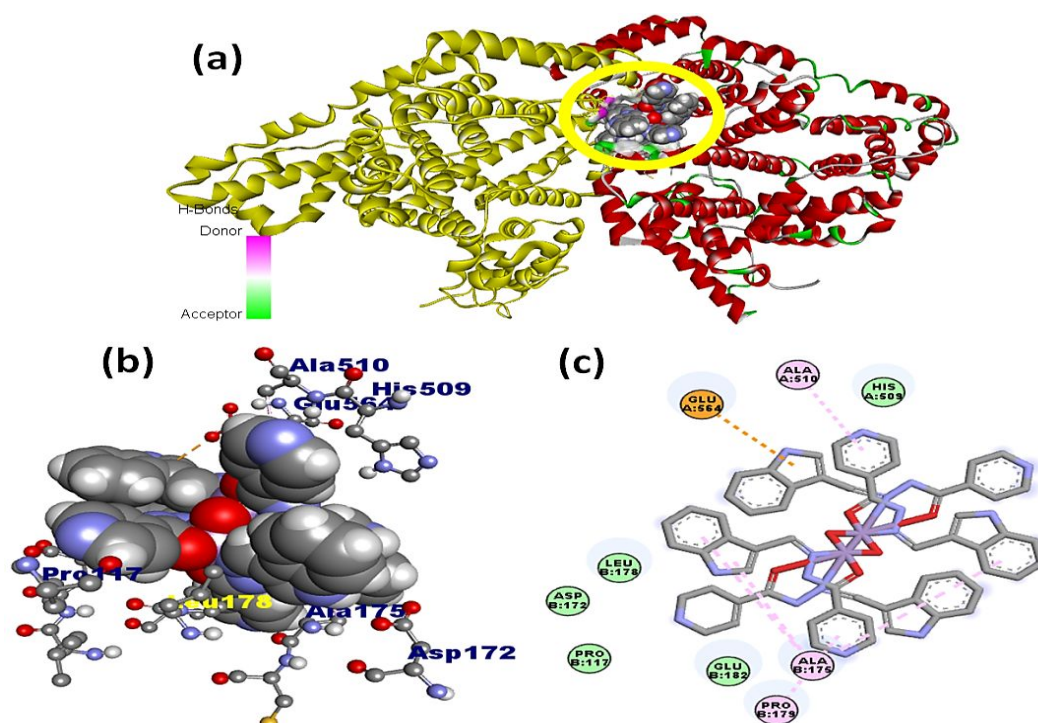

**Figure S26** (a) Molecular docked model of complex **1** located within the hydrophobic pocket in subdomain IIA of BSA stabilized by intricate hydrogen bonding interactions and van der Waals forces, (b) interaction of complex **1** with amino acid residues showed in 3D view and (c) interaction of complex **1** with amino acid residues showed in 2D view.



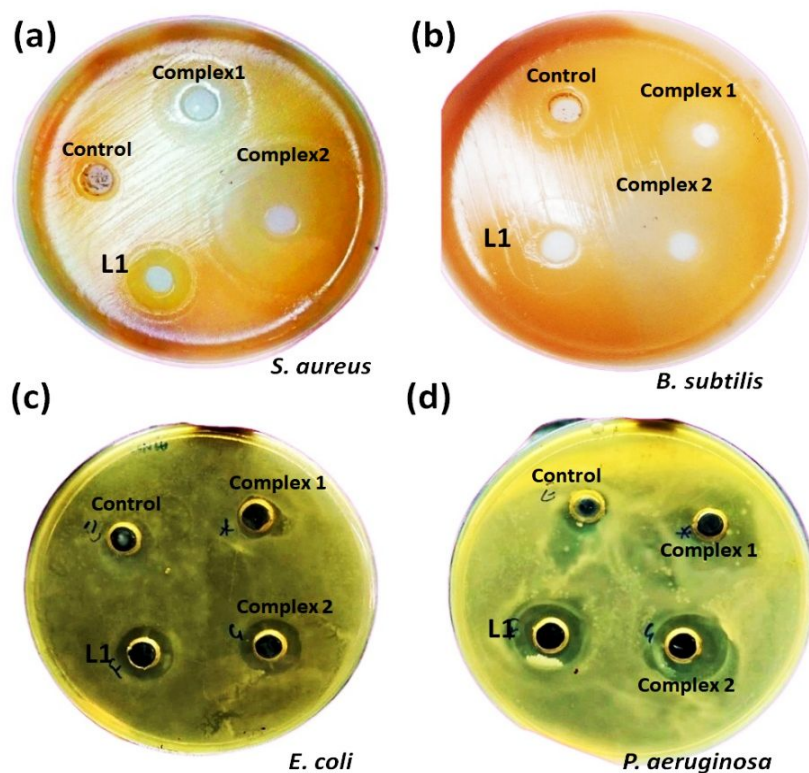

**Figure S27.** Comparative antibacterial action of control (solvent), ligand (L1) and complexes 1 & 2 against (a & b) gram positive (*S. aureus* and *B. subtilis*) and (c & d) gram-negative (*E. coli* and *P. aeruginosa*) bacterial strains.

## References

- (S1) Dasgupta, S.; Karim, S.; Banerjee, S.; Saha, M.; Saha, K. D.; Das, D. Designing of novel zinc (II) Schiff base complexes having acyl hydrazone linkage: study of phosphatase and anti-cancer activities. *Dalton Trans.* **2020**, 49, 1232–1240.
- (S2) Chang, H. Q.; Jia, L.; Xu, J.; Xu, Z. Q.; Chen, R. H.; Wu, W. N.; Bie, H. Y.; Zhu, T. F.; Ma, T. L.; Wang, Y. Syntheses, characterizations, antitumor activities and cell apoptosis induction of Cu (II), Zn (II) and Cd (II) complexes with hydrazone Schiff base derived from isonicotinohydrazide. *Inorg. Chem. Commun.* **2015**, 57, 8–10.
- (S3) Stevanovic, N.; Zlatar, M.; Novaković, I.; Pevec, A.; Radanović, D.; Matic, I. Z.; Crnogorac, M. D.; Stanojković, T.; Vujcic, M.; Gruden, M.; Sladic, D.; Anđelkovic, Iztok T. K.; Cobeljic, B. (). Cu (II), Mn (II) and Zn (II) complexes of hydrazones with a quaternary ammonium moiety: synthesis, experimental and theoretical characterization and cytotoxic activity. *Dalton Trans.* **2022**, 51, 185–196.
- (S4) Baharuddin, P.; Satar, N.; Fakiruddin, K. S.; Zakaria, N.; Lim, M. N.; Yusoff, N. M.; Zakaria, Z.; Yahaya, B. H. Curcumin improves the efficacy of cisplatin by targeting cancer stem-like cells through p21 and cyclin D1-mediated tumour cell inhibition in non-small cell lung cancer cell lines. *Oncol. Rep.* **2016**, 35, 13–25.
